# Supplementary material for: Benign Paroxysmal Positional Vertigo (BPPV): History, Pathophysiology, Office Treatment and Future Directions
Source: Int J Otolaryngol. 2011 Jul 25;2011:835671. doi: 10.1155/2011/835671 (PMC3144715; doi:10.1155/2011/835671)
Supplement: Supplementary file 1 — The supplementary videos show examples of BPPV from the posterior, horizontal and superior canals, and a Semont maneuver for right posterior canal BPPV. [file 835671.f1.zip]

Archive with 5 entries (5 files):
- 835671.f1/Video 1.mpg
- 835671.f1/Video 2.mpg
- 835671.f1/Video 3.mpg
- 835671.f1/Video 4.mpg
- 835671.f1/Video 5.mpg
